# Supplementary material for: Healthcare Access Barriers Among Deaf Adolescents in Nepal: A Cross-Sectional Study to Inform Provider awareness
Source: Research Square preprint supplement (doi:10.21203/rs.3.rs-7542608/v1), 2025-10-30
Supplement: Supplementary file 1 [file 47ab44d5c793bb6de6bcffaf.docx]

**“HEALTHCARE ACCESS BARRIERS AMONG DEAF ADOLESCENTS IN NEPAL: A CROSS-SECTIONAL STUDY TO INFORM PROVIDER AWARENESS”**

**QUESTIONNAIRES**

| 1. **Socio-Demographic Characteristics of Respondents** | | |
| --- | --- | --- |
| **S.N.** | **Questions** | **Response** |
| **1.** | Age | ........... |
| **2.** | Gender | 1. Male 2. Female 3. Other (specify) ……… |
| **3.** | Ethnicity/ Caste | 1. Brahmin 2. Chhetri 3. Janajati (Newar, Rai, Sherpa, Thakali, Tamang, Limbu, Magar) 4. Madhesi 5. Dalit 6. Other (specify) ……………….. |
| **4.** | Religion | 1. Hinduism 2. Buddhism 3. Christianity 4. Islam |
| **5.** | School Grade | 1. Grade 8 2. Grade 9 3. Grade 10 4. Diploma 1st year 5. Diploma 2nd year 6. Diploma 3rd year |
| **6.** | Permanent Residence (District) | …………………….. |
| **7.** | Parent’s Main Occupation | 1. Agriculture 2. Business 3. Foreign Employment 4. Government Job 5. Labour 6. Other (specify) ......................... |
| **8.** | Family Income (per month) | 1. Less than 20,000 2. 21000 to 40,000 3. Above 41,000 |
| **9.** | Father’s Educational Level | 1. Cannot read and write 2. Primary (class 1 to 5) 3. Lower secondary (class 6 to 8) 4. Secondary (class 9 to 10) 5. Higher secondary (class 11 to 12) 6. Bachelor’s degree and above 7. Don’t know |
| **10.** | Mother’s Educational Level | 1. Cannot read and write 2. Primary (class 1 to 5) 3. Lower secondary (class 6 to 8) 4. Secondary (class 9 to 10) 5. Higher secondary (class 11 to 12) 6. Bachelor’s degree and above 7. Don’t know |

| 1. **Personal Information and Family History** | | |
| --- | --- | --- |
| **11.** | Do you use any assistive listening devices? | 1. Hearing aid 2. Cochlear implant 3. Both 4. None |
| **12.** | What level of hearing impairment (degree of hearing loss) do you have? | 1. Profound 2. Severe 3. Moderate 4. Mild 5. Don’t know |
| **13.** | Cause of hearing impairment/ onset:  If acquired, what was the cause? | 1. Congenital (by birth) 2. Acquired (after birth) 3. Illness 4. Trauma 5. Other (specify) ……………… |
| **14.** | Do you have any family members with hearing impairment? | 1. Yes 2. No |

| 1. **Structural Barriers** | | |
| --- | --- | --- |
| **15.** | Do you face transportation barriers to reach health facilities? | 1. Yes 2. No |
| **16.** | Do long waiting times at health facilities bother you? | 1. Yes 2. No |
| **17.** | Where do you find most comfortable communicating? | 1. School 2. Home 3. With outsiders |

| 1. **Communication with Healthcare Providers** | | |
| --- | --- | --- |
| **18.** | How do you communicate with hearing people? | 1. Lip-reading 2. Writing 3. Gestures 4. Interpreter |
| **19.** | How do you communicate with hearing-impaired people? | 1. Lip-reading 2. Writing 3. Gestures 4. Interpreter |
| **20.** | How do you communicate with healthcare providers? | 1. Lip-reading 2. Writing 3. Gestures 4. Interpreter |
| **21.** | Do you ask healthcare providers to repeat unclear instructions? | 1. Yes 2. No |
| **22.** | Can you easily communicate with the providers? | 1. Yes 2. No |
| **23.** | Best way for you to get health information and advices (Multiple choice question) | 1. Booklet 2. Support person 3. Parents 4. School 5. Magazine 6. DVD 7. Friends 8. Internet 9. Other (specify) ………………. |

| 1. **Attitudes of Healthcare Providers** | | |
| --- | --- | --- |
| **24.** | Do you find healthcare providers friendly? | 1. Yes 2. No |
| **25.** | Do you feel comfortable interacting with providers?If No, Why? | 1. Yes 2. No   …………………………………… |
| **26.** | Do you receive special attention from providers? | 1. Yes 2. No |
| **27.** | Do you hesitate to visit health facilities? If Yes, Why? | 1. Yes 2. No   ……………………………………. |
| **28.** | Have you ever felt mistreated by healthcare providers? | 1. Yes 2. No |
| **29.** | Have you ever felt mistreated by other staff at health facilities? | 1. Yes   No |
| **30.** | Major challenges faced due to hearing impairment (Multiple choice question) | 1. Communication 2. Hearing people’s views 3. Joining activities/ sports 4. Making friends 5. Listening to music 6. Bullying 7. Hearing aid/ implants 8. Others (specify) ……………….. |

| 1. **Financial Barriers** | | |
| --- | --- | --- |
| **31.** | Do you experience cost-related problems when accessing specific providers and services, prescriptions and OTC medications, equipment, repairs, and supplies? | 1. Never 2. Rarely 3. Sometimes 4. Regularly |
| **32.** | Have you heard about health insurance? | 1. Yes 2. No |
| **33.** | Do you have health insurance? If yes, have you ever used it? | 1. Yes 2. No   ………………………………….. |
| **34.** | How do you finance your health services? (Multiple choice questions) | 1. School 2. Out-of-Pocket (self/family) 3. Free government health service 4. Charity organizations 5. Other (specify) …………….. |

**Additional Comments:**

If you would like to share any further thoughts, experiences, or suggestions regarding healthcare access or services, please write them below:

………………………………………………………………………………………………………

………………………………………………………………………………………………………

………………………………………………………………………………………………………

**Thank you for your participation!**

# **IN-DEPTH INTERVIEW GUIDELINES**

| **THEME** | **MAIN QUESTIONS** | **PROBE QUESTIONS** |
| --- | --- | --- |
| **Socio-Demographic Characteristics** | - Candidate number - Age (in complete years) - Gender - School grade | - No probes – factual |
| **Personal Information and Family History** | - Degree of hearing impairment - Onset of hearing impairment - Hearing-impaired members in the family | - If acquired, what was the cause? - Are there any difficulties in communicating with family members? |
| **Structural Barriers** | - Communication barriers ever faced - Transportation barriers ever faced - Waiting times in health facilities - Any other structural barriers encountered | - How do you manage communication barriers? - How do you manage transportation barriers? - How do you manage long waiting times in health facilities? - What solutions would help overcome these barriers? |
| **Communication with Healthcare Providers** | - How do you communicate with healthcare providers? - Do you ask healthcare providers to repeat instructions if you do not understand? - Can you easily communicate with healthcare providers? - Where do you feel most comfortable communicating? - Best way to receive health information and advice | - What difficulties do you face when communicating with healthcare providers? - When you do not understand instructions, how do you handle it? - In which settings do you feel most confident communicating with healthcare providers, and why? - Which sources or methods help you understand health information best, and why? |
| **Attitudes of Healthcare Providers** | - Personal experiences during healthcare visits (communication, behaviour of healthcare providers and staff) - Influence of barriers on healthcare access | - Can you describe any positive or negative experiences with healthcare providers? - How do these experiences affect your confidence or motivation to seek healthcare services? - Have you faced any other personal barriers? - What solutions would help overcome these barriers? |
| **Financial Barriers** | - Do you experience financial difficulties when accessing healthcare services? - Do you have health insurance? If yes, have you ever utilized the benefits? - How do you finance your healthcare needs? - What strategies do you use to manage cost-related problems? | - When you do not have enough money for healthcare, what actions do you take? - What suggestions do you have for reducing financial barriers for people with hearing impairments? |
